# Supplementary material for: Alzheimer’s Disease: Mechanism and Approach to Cell Therapy
Source: Int J Mol Sci. 2015 Nov 4;16(11):26417–51. doi: 10.3390/ijms161125961 (PMC4661820; doi:10.3390/ijms161125961)
Supplement: Supplementary file 1 [file ijms-16-25961-s001.pdf]

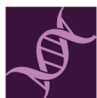

# Supplementary Information

## Materials and Methods

### *Animals*

C57BL/6 male mice ( $n = 25$ ), 129S2/SvHsd male mice ( $n = 24$ ) (The AnLab Ltd., Prague, Czech Republic), and male mice of the triple transgenic mouse model of Alzheimer's Disease (3xTg-AD), which harbour three transgenes of PS1 (M146V), tau (P301L) and APP (SWE) ( $n = 28$ ) (The Jackson Laboratory, Bar Harbour, Ellsworth, ME, USA), were bred in our animal facility. All experiments were performed in accordance with the European Union Directive 2010/63/EU regarding the use of animals in research and were approved by the Ethics Committee of the Institute of Experimental Medicine, Academy of Sciences of the Czech Republic.

### *Behaviour test*

Spatial reference memory was evaluated using a conventional Morris water maze [353,354]. Mice were trained in a circular pool (1.2 m in diameter) that was filled with water made opaque by nontoxic white paint and maintained at 25 °C. An escape platform (10 cm in diameter) was positioned in the middle of one of the quadrants and submerged 1 cm under the water surface. Mice were given 4 trials per day, each of which was started from a different location within each of the quadrants, and trained for 10 days. A probe trial, in which the hidden platform was removed from the pool, was performed 24 h after the last acquisition trial. The latency to find a hidden platform, swimming distance, swimming velocity, and visit frequency to each quadrant were automatically monitored with a video tracking system (VideoMot2, TSE systems GmbH, Bad Homburg, Germany).

### *Statistical analysis*

The data are expressed as mean  $\pm$  SEM. The comparison of three groups was assessed by a one-way analysis of variance (ANOVA) followed by Turkey's *post-hoc* test. A value of  $p < 0.05$  was considered statistically significant.
